# Supplementary material for: Mechanical and thermal properties of graphyne-coated carbon nanotubes: a molecular dynamics simulation on one-dimensional all-carbon van der Waals heterostructures
Source: Royal Society of Chemistry journal article supplement (doi:10.1039/d2cp05673a), 2023-01-01
Supplement: d2cp05673a1.pdf [file d2cp05673a1.pdf]

Supplementary information for

**Mechanical and thermal properties of graphyne-coated carbon nanotubes:**

**A molecular dynamics simulation on one-dimensional all-carbon van der**

**Waals heterostructures**

**1. Supplementary table**

**Tab. S1** The thermal conductivity of CNT and GNT with different chiralities

|            | Armchair-CNT | Zigzag-CNT | Armchair-GNT | Zigzag-GNT |
|------------|--------------|------------|--------------|------------|
| $k$ (W/mK) | 156.79       | 149.26     | 9.81         | 10.01      |

**2. The details of the AA, AZ, ZA and ZZ structures of CNT@GNT**

Unless otherwise specified, in the present study the AA structure represents (15,15)CNT@(7,7)GNT, AZ structure represents (15,15)CNT@(12,0)GNT, ZA structure represents (26,0)CNT@(7,7)GNT and ZZ structure represents (26,0)CNT@(12,0)GNT, respectively. In addition, the length of CNT@GNT is determined by the number of its unit cell in the axial direction. A CNT@GNT unit cell requires a pairing with the smallest value of the percentage of length mismatch of its CNT and GNT components. The numbers of CNT and GNT unit cells used to construct a CNT@GNT unit cell are listed in Tab. S2.

**Tab. S2** Numbers of CNT and GNT unit cells in a unit cell of CNT@GNT with different chiralities

|    | Number of CNT unit cells | Number of GNT unit cells |
|----|--------------------------|--------------------------|
| AA | 82                       | 29                       |
| AZ | 78                       | 16                       |
| ZA | 46                       | 28                       |
| ZZ | 45                       | 16                       |

### 3. Supplementary figure

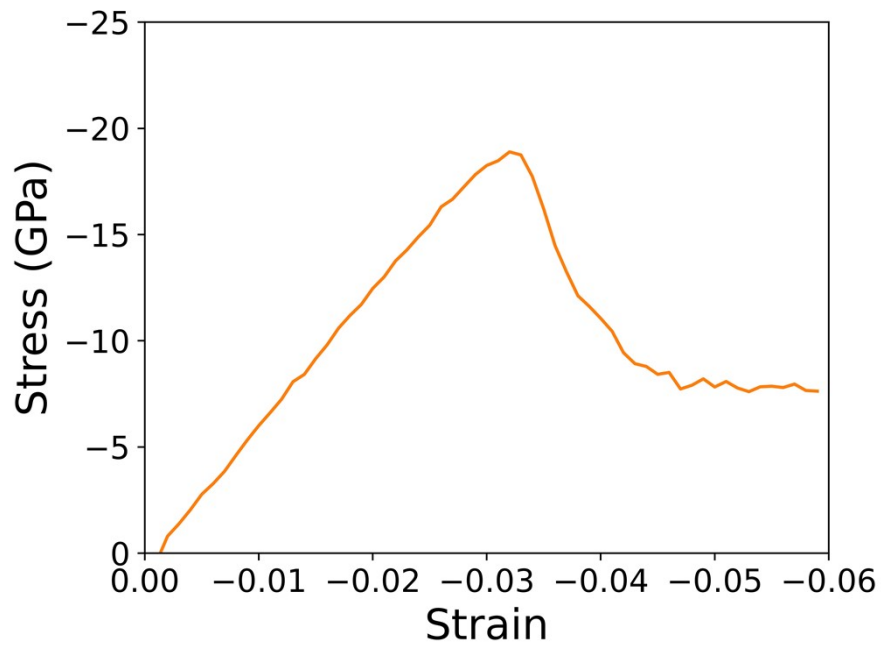

**Fig. S1.** Stress-strain curves for CNT@GNT under compression.
